# Supplementary material for: Methodenpapier zur Koordination der Datenerhebung und -auswertung an Hochschul- und Ausbildungsambulanzen für Psychotherapie (KODAP)
Source: Atypon-hosted journal article supplement (doi:10.1026/1616-3443/a000431), 2017-07-01

## **KODAP**

Koordination der Datenerhebung und -auswertung an Hochschul- und Ausbildungsambulanzen für Psychotherapie

## **Koordination der Datenerhebung und -auswertung an Hochschul- und Ausbildungsambulanzen für Psychotherapie (KODAP)**

### **Kooperationsvereinbarung**

#### **§0 Ziel der Vereinbarung und Struktur von KODAP**

Im „Verbund universitärer Ausbildungsinstitute für Psychotherapie – unith e.V.“ sind sowohl Ausbildungsinstitute mit ihren Ambulanzen als auch Hochschulambulanzen nach § 117 SGB-V Mitglieder; letztere haben den Status von Fördermitgliedern. Satzungsgemäß gehören die Qualitätssicherung sowie die Weiterentwicklung und Förderung der Psychotherapeutenausbildung zu den Aufgaben und Zielen von unith. Ziel dieser Kooperationsvereinbarung ist, die an den Mitgliedsinstitutionen erhobenen Daten gemeinschaftlich für die Bearbeitung wissenschaftlicher Fragestellungen zur Weiterentwicklung der Psychotherapie und damit verbunden der Ausbildung im Bereich Psychotherapie zu nutzen. Mit dieser Vereinbarung wird der Forschungsverbund „KODAP“ gegründet und damit eine rechtlich und funktionell geeignete Organisationsstruktur geschaffen. Grundsätzlich sind alle Verbundpartner (Ambulanzen) gleichberechtigt und kontrollieren gemeinschaftlich die Aktivitäten des Forschungsverbundes.

Im Einklang mit den satzungsgemäßen Zielen, übernimmt unith die **Trägerschaft** von KODAP. Dies bedeutet, dass spezifisch für KODAP jeweils ein Vertragsverhältnis zwischen unith e.V. und den einzelnen Verbundpartnern (Ambulanzen) geschaffen wird. Der Verbund KODAP selbst besteht somit aus unith sowie denjenigen Ambulanzen, die dem Verbund durch Vertragsunterzeichnung beigetreten sind. Diese Ambulanzen müssen selbst wiederum Mitglieder oder Fördermitglieder von unith sein.

Um die wissenschaftlichen und operativen Aufgaben des Forschungsverbunds zielorientiert zu bearbeiten, werden eine **Steuerungsgruppe** sowie ein **Koordinierungszentrum** eingesetzt. Die Steuerungsgruppe hat vor allem die Aufgabe, die operative und wissenschaftliche Arbeit, inklusive der Planung von Publikationen innerhalb des Verbundes zu koordinieren; das Koordinierungszentrum übernimmt in erster Linie die Zusammenführung, Speicherung und methodische Auswertung der Daten. Zum Zeitpunkt der Gründung des Forschungsverbunds (KODAP) besteht die Steuerungsgruppe aus folgenden Personen: Prof. Dr. Jürgen Hoyer (Dresden; Sprecher), Prof. Dr. Cord Benecke (Kassel), Prof. Dr. Matthias Berking (Erlangen-Nürnberg), Prof. Dr. Tina In-Albon (Landau), Prof. Dr. Jürgen Margraf (Bochum), Prof. Dr. Tania Lincoln (Hamburg), Prof. Dr. Wolfgang Lutz (Trier), Prof. Dr. Angelika Schlarb (Bielefeld), Prof. Dr. Henning Schöttke (Osnabrück), Prof. Dr. Ulrike Willutzki (Witten-Herdecke). Diese wurden während der Vorbereitungsphase von KODAP benannt und von der unith-Mitgliederversammlung am 20. März 2017 bestätigt. Näheres zur Amtszeit und Wahl der Mitglieder der Steuerungsgruppe regelt deren Geschäftsordnung.

Das Koordinierungszentrum wird im Benehmen mit der Steuerungsgruppe von unith beauftragt. Bei Gründung des Verbunds hat diese Aufgabe in Absprache mit unith und der Steuerungsgruppe die Ruhr-Universität Bochum (Prof. Dr. Jürgen Margraf) übernommen, die auch eine Mitarbeiterin für Koordinierungsaufgaben zur Verfügung stellt (Dr. Julia Velten).

Eine grafische Übersicht zu den genannten Organen des Forschungsverbunds findet sich im Anhang dieser Vereinbarung.

Zwischen dem Projektträger **unith e.V.** (Verbund universitärer Ausbildungsgänge für Psychotherapie), vertreten durch Prof. Dr. Thomas Fydrich (1. Vorsitzender)

und

---

Name der Hochschulambulanz

bzw.

---

Name der Ausbildungsambulanz

wird zur gemeinsamen Durchführung des Verbundvorhabens

**Koordination der Datenerhebung und -auswertung an Hochschul- und Ausbildungsambulanzen für Psychotherapie (KODAP)**

Folgendes vereinbart:

Die Verbundpartner kooperieren entsprechend der in §0 genannten Ziele.

Inhaltsverzeichnis:

- § 1 Vertragsgegenstand
- § 2 Laufzeit
- § 3 Rechte und Pflichten
- § 4 Vertraulichkeit
- § 5 Haftung
- § 6 Kündigung
- § 7 Sonstiges
- § 8 Inkrafttreten

Anlagen:  
Organigramm KODAP

## **§ 1 Vertragsgegenstand**

Gegenstand des Vertrages ist die Regelung der Zusammenarbeit im Rahmen des Verbundvorhabens.

Mit dem Ziel, einen Datensatz der Hochschul- und Ausbildungsambulanzen für gemeinsame Forschungsprojekte zu generieren und fortzuführen, übersenden die Verbundpartner jährlich die in dem gemeinsam festgelegten Variablenplan für den Kerndatensatz definierten Datenbestände ihrer Ambulanz. Dabei handelt es sich (je nach Einrichtung) um die Daten einer Forschungs- und Lehrambulanz (Hochschulambulanz), einer Ausbildungsambulanz oder beider Formen einer Ambulanz. Jeder Verbundpartner ist für die Erhebung und Aufbereitung der Daten selbst verantwortlich. Es gelten die für den Datenschutz vereinbarten und in dem Ethikantrag an die Ruhr-Universität Bochum vom 8.6.2015 beschriebenen Bedingungen.

## **§ 2 Laufzeit**

Das Verbundvorhaben beginnt am 01. April 2017 und hat eine Laufzeit von zunächst fünf Jahren (bis 31. März 2022). Verlängerungen sind möglich.

## **§ 3 Rechte und Pflichten**

1. Die Verbundpartner werden sich in Bezug auf den Vertragsgegenstand kontinuierlich über die Forschungsziele abstimmen, sich über die Forschungsergebnisse bzw. den Fortgang der Arbeiten unterrichten, sowie die Zwischen- und Schlussberichte austauschen. Diese werden vom Koordinierungszentrum (gegenwärtig Ruhr-Universität Bochum) angefertigt. Entscheidungen über die Organisation oder Inhalte der Projekte sollen in der Steuerungsgruppe im Einvernehmen mit dem Projektträger und dem Koordinierungszentrum getroffen werden. Die Steuerungsgruppe (siehe unten) und der Projektträger (unith e.V.) prüfen die Zwischen- und Schlussberichte. Im Fall von Konflikten zwischen den Kooperationspartnern oder den Organen des Forschungsverbunds kommt dem Träger (unith) die Pflicht zu, im Benehmen mit den Kooperationspartnern ein Schlichtungsprozedere vorzuschlagen.
2. Das Koordinierungszentrum hat insbesondere die Aufgabe, die Arbeiten der einzelnen Verbundpartner sachlich und zeitlich zu koordinieren. Treten Abweichungen vom Gesamtarbeits- und Zeitplan auf, wird er die Partner möglichst frühzeitig darauf aufmerksam machen und Maßnahmen zur Überwindung eingetretener Schwierigkeiten vorschlagen.
3. Jeder Verbundpartner wird das Koordinierungszentrum zeitnah über alle Umstände informieren, die den erfolgreichen Abschluss eines Teils oder des gesamten Verbundvorhabens aus fachlichen, technischen, wirtschaftlichen oder sonstigen Gründen beeinträchtigen. Dies gilt auch für die Einhaltung der Termine. Das Koordinierungszentrum informiert sodann die betroffenen Partner.
4. Das Koordinierungszentrum oder eine vom Projektträger beauftragte Person bereitet im Benehmen mit der Steuerungsgruppe die zur Durchführung des Gesamtarbeits- und Zeitplans notwendigen Sitzungen der Steuerungsgruppe vor und lädt hierzu mit einer angemessenen Frist unter Beifügung der Tagesordnung ein und ist für die Erstellung und den Versand der Sitzungsprotokolle verantwortlich.

5. Die Steuerungsgruppe<sup>1</sup> setzt sich aus von den Kooperationspartnern entsandten Mitgliedern zusammen. Die seit April 2014 bestehende, die Gründung dieses Verbunds vorbereitende, Steuerungsgruppe stellt sich spätestens bis 31. März 2018 einer Wahl. Die Steuerungsgruppe wird für einen Zeitraum von fünf Jahren gewählt; Neuwahlen einzelner Mitglieder sind möglich. Näheres regelt eine Geschäftsordnung.
6. Die im Rahmen des Projektes erarbeiteten Arbeitsergebnisse gelten grundsätzlich als gemeinschaftlich erarbeitete Arbeitsergebnisse und gehören den Verbundpartnern gemeinsam. Bei Publikationen gelten die Bestimmungen unter §5.
7. Die Verbundpartner räumen sich auf Verlangen an den bei ihnen bei Vertragsbeginn vorhandenen Erfindungen und Schutzrechten (zum Beispiel Messverfahren), soweit sie dazu berechtigt sind und soweit zur Durchführung des Verbundvorhabens notwendig, ein nicht-ausschließliches, nichtübertragbares, unentgeltliches Nutzungsrecht für die Dauer und Durchführung des Verbundvorhabens ein. Ein hiernach eingeräumtes Nutzungsrecht berechtigt insbesondere nicht zur Bearbeitung oder Veränderung der Erfindung und des Schutzrechtes. Für bei Vertragsbeginn vorhandenes Know-how und vorhandene Urheberrechte, einschließlich Software, gilt § 3 Ziff. 7 Satz 1 dieses Vertrages entsprechend.

#### **§ 4 Vertraulichkeit**

Die Verbundpartner werden alle als geheimhaltungsbedürftig erklärten Informationen technischer oder wirtschaftlich-geschäftlicher Art eines anderen Verbundpartners während der Laufzeit und zehn weitere Jahre nach Beendigung des Verbundvorhabens vertraulich behandeln und nicht ohne schriftliche Zustimmung des betroffenen Partners Dritten zur Verfügung stellen. Die Pflicht zur Geheimhaltung gilt auch für die Informationen, bei denen sich aus den Umständen bereits die Geheimhaltungsbedürftigkeit ergibt. Diese Verpflichtung entfällt für Informationen, die

- der Öffentlichkeit vor Inkrafttreten dieses Vertrages bekannt oder allgemein zugänglich waren oder
- der Öffentlichkeit nach dem Inkrafttreten dieses Vertrages ohne Mitwirken oder Verschulden des empfangenden Verbundpartners bekannt oder allgemein zugänglich werden oder
- dem empfangenden Verbundpartner bei Erhalt der Information bereits bekannt waren oder
- die dem empfangenden Verbundpartner zu irgendeinem Zeitpunkt von einem berechtigten Dritten offenbart oder zugänglich gemacht werden oder
- von einem Mitarbeiter des empfangenden Verbundpartners ohne Kenntnis der Information entwickelt wurde oder
- aufgrund gerichtlicher oder behördlicher Anordnung ordnungsgemäß offenzulegen sind.

---

<sup>1</sup> Es besteht seit April 2014 eine vorläufige Steuerungsgruppe aus HochschullehrerInnen (s.o.).

## **§ 5 Publikationen**

1. Die Rechte der Veröffentlichung von Forschungsergebnissen aus den Projekten stehen primär denjenigen Personen zu, von denen die zugrundeliegenden Forschungsergebnisse erbracht wurden. Aufgrund des Verbundcharakters des Vorhabens und aufgrund der Tatsache, dass von jedem Verbundpartner substanzielle und selbstständige Forschungsleistungen erbracht werden, erwirbt jeder Verbundpartner das Recht, auf jeder Publikation des Verbunds mit mindestens einem/einer Co-Autor/in berücksichtigt zu werden. Diese/r wird durch den jeweiligen Verbundpartner bestimmt.
2. Als Autoren einer wissenschaftlichen Originalveröffentlichung sollen alle diejenigen firmieren, die zur Konzeption der Studie, zur Erarbeitung, Analyse und Interpretation der Daten und zur Formulierung des Manuskriptes selbst wesentlich beigetragen und einer Veröffentlichung zugestimmt haben.
3. Die Steuerungsgruppe fungiert gleichzeitig als Publikationskomitee und regelt eine angemessene Berücksichtigung der Autoren- und Koautorenschaft. Inwieweit ausgeschiedene Mitarbeiter aus früheren Projektphasen auf Nachfolgepublikationen zu berücksichtigen sind, wird durch die jeweiligen Verbundpartner entschieden.
4. Die Steuerungsgruppe prüft regelmäßig die Anzahl der im Umlauf des Forschungsverbundes befindlichen Manuskripte und legt die Frist für mögliche Kommentare der Co-Autoren fest.
5. Alle Publikationsinteressen-Bekundungen sind in Abstract-Form (eine Seite) vor Aufnahme der konkreten Arbeiten der Steuerungsgruppe als Vorschlag zur Kenntnis zu bringen. Dem Abstract ist eine Vorschlagsliste der Autoren und Ko-Autoren beizufügen. Die Steuerungsgruppe informiert alle Verbundpartner über die jeweils aktuell geplanten Publikationsprojekte. Allen Verbundpartnern muss eine angemessene Frist eingeräumt werden, zum Vorhaben Stellung zu beziehen (Ko-Autoren, Überschneidungen, Prioritäten, methodische Besonderheiten).
6. In Absprache mit der Steuerungsgruppe kann das Erstautorenrecht für bestimmte Fragestellungen, die sich auf den Gesamtdatensatz beziehen, auch auf Forscherinnen und Forscher übertragen werden, die keinem der Verbundpartner angehören.
7. Alle beteiligten Verbundpartner sind über Veröffentlichungen auf der Grundlage der Daten des Verbundprojektes zu informieren.
8. Jeder beteiligte Verbundpartner hat das Recht, die bei ihm erhobenen Daten und Ergebnisse (lokale Projektdaten unter Berücksichtigung der Autorenrechte) selbständig zu publizieren, sofern diese keinen Vorgriff auf die am Gesamtdatensatz zu beantwortenden, bereits konsentierten Fragestellungen darstellen.

## **§ 6 Finanzen**

1. Für die Kosten der Datenerhebung vor Ort sowie die Übermittlung der Daten ist der jeweilige Verbundpartner verantwortlich.
2. Die grundsätzliche Verantwortung und Entscheidungskompetenz für die Finanzierung der Aktivitäten des Forschungsverbunds liegt beim Projektträger.
3. Jedwede kostenauslösende Entscheidung für die Umsetzung der Aufgaben der Forschungs koordinierung durch die Steuerungsgruppe, die haushaltsrelevant für unith wird, bedarf der Zustimmung des unith-Vorstands.

## § 7 Haftung

1. Der Verbund verpflichtet sich zur Einhaltung allgemein akzeptierter ethischer und wissenschaftlicher Standards im Sinne einer „good clinical practice“ (EMA, 2006). Kein Verbundpartner haftet für die Richtigkeit der im Rahmen dieses Vertrages übermittelten Forschungs- und Entwicklungsergebnisse. Desgleichen haftet kein Verbundpartner dafür, dass die von ihm gewährten Nutzungsrechte frei von Rechten Dritter ausgeübt werden können. Die vorgenannten Haftungsbeschränkungen gelten nicht in Fällen von Vorsatz und grober Fahrlässigkeit.
2. Ansprüche der Verbundpartner gegeneinander, gegen ihre leitenden Mitarbeiter und gesetzlichen Vertreter, Erfüllungs- und Verrichtungsgehilfen auf Ersatz von Schäden aus Pflichtverletzungen und aus unerlaubter Handlung sind ausgeschlossen, soweit sie nicht auf Vorsatz beruhen.
3. Die vorstehenden Haftungsbeschränkungen bzw. -ausschlüsse der Ziffern 1 und 2 gelten nicht im Falle einer Verletzung des Lebens, des Körpers oder der Gesundheit sowie bei Ansprüchen nach dem Produkthaftungsgesetz.

## § 8 Kündigung

1. Jeder Verbundpartner kann seine Beteiligung am Verbundvorhaben aus wichtigem Grund kündigen. Ein wichtiger Grund liegt insbesondere vor, wenn die Weiterarbeit für den Verbundpartner unzumutbar geworden ist oder seine Förderung nachträglich wesentlich verringert wurde. Im Falle der Kündigung sind mögliche Zuwendungsgeber von dem Verbundpartner über das Ausscheiden aus dem Verbundvorhaben zu informieren.
2. Im Falle des Ausscheidens eines Verbundpartners
  - enden die ihm gemäß § 3 eingeräumten Rechte, mit Ausnahme der Rechte § 3 Ziff. 6, soweit diese bis zu seinem Ausscheiden entstanden sind;
  - bleibt er weiterhin zur Vertraulichkeit gemäß § 4 verpflichtet;
  - bleiben die den anderen Verbundpartnern durch den vorliegenden Vertrag eingeräumten Nutzungs- und Benutzungsrechte unberührt;
  - können, soweit die Fortführung des Verbundvorhabens sinnvoll erscheint, die nicht erfüllten Aufgaben des ausscheidenden Verbundpartners durch einen neuen Verbundpartner im Einvernehmen mit den verbleibenden Verbundpartnern übernommen werden.
- Anonymisierte Daten, die beim Austritt eines Verbundpartners schon im Gesamtdatensatz enthalten sind, verbleiben im Datensatz und können für die Bearbeitung weiterer Fragestellungen genutzt werden.
- Die Verpflichtungen der anderen Verbundpartner gemäß § 3 Ziff. 6 gelten dem ausscheidenden Verbundpartner gegenüber nur für Forschungs- und Entwicklungsergebnisse, die vor Zugang der Kündigung erzielt worden sind. Die verbleibenden Verbundpartner sind dem ausscheidenden Verbundpartner auch weiterhin zur Vertraulichkeit nach § 4 verpflichtet. Die gemäß § 8 Ziff. 2 verbleibenden Rechte des ausscheidenden Verbundpartners sowie seine Verpflichtungen gemäß § 3, § 4 und § 6 gelten auch nach seinem Ausscheiden für alle Forschungs- und Entwicklungsergebnisse und Schutzrechte, die er aufgrund von Arbeiten erhalten hat, deren Durchführung er im Rahmen des Verbundvorhabens bereits erfüllt hat.

3. Für den Fall, dass die Verbundpartner einvernehmlich feststellen, dass das mit dem Verbundvorhaben verfolgte Ziel nicht erreicht werden kann und damit die Grundlage für den vorliegenden Vertrag entfällt, werden sich die Verbundpartner über das weitere Vorgehen einschließlich der Rechte an bis dahin entstandenen Forschungsergebnissen verständigen und gegebenenfalls darüber eine gesonderte Vereinbarung treffen.

## **§ 9 Sonstiges**

1. Änderungen und Ergänzungen dieses Vertrages müssen als solche gekennzeichnet sein und bedürfen zu ihrer Rechtswirksamkeit der Schriftform. Dies gilt auch für das Abbedingen des Schriftformerfordernisses.
2. Sofern von einem Verbundpartner durchzuführende Arbeiten durch Dritte ausgeführt werden, ist von dem Verbundpartner sicherzustellen, dass die hierbei entstehenden Ergebnisse den übrigen Verbundpartnern entsprechend den Bestimmungen dieses Vertrages zur Verfügung gestellt werden.
3. Sollte eine Bestimmung dieses Vertrages unwirksam sein oder werden, so berührt dies die Wirksamkeit im Übrigen nicht. Die Verbundpartner sind verpflichtet, die unwirksame Bestimmung durch eine wirksame zu ersetzen, die dem Sinn und Zweck der unwirksamen Regelung entspricht. Entsprechendes gilt im Fall einer Lücke.
4. Kein Verbundpartner ist berechtigt, mit Wirkung für andere Verbundpartner ohne deren vorherige ausdrückliche schriftliche Zustimmung Verpflichtungen zu übernehmen.
5. Ein gesellschaftsrechtliches oder gesellschaftsähnliches Verhältnis wird durch diese Vereinbarung nicht getroffen.
6. In Konfliktfällen, ggf. auch bei solchen, die erst nach Beendigung eines Vereinbarungsverhältnisses entstehen, initiiert der Projektträger zusammen mit Konfliktparteien, den Verbundpartnern und der Steuerungsgruppe einen Schlichtungsprozess.

## **§ 10 Inkrafttreten**

Dieser Vertrag tritt mit Unterzeichnung, frühestens jedoch am 01. April 2017 in Kraft.

**Unterschriften**

**Für die unter §0 genannten Hochschul- bzw. Ausbildungsambulanz(en)**

Ort, Datum .....

.....  
Leiter der Ambulanz/Rektor

Projektträger: unith e.V.  
Vertreten durch 1. Vorsitzenden

.....



Anhang 1.

Organigramm KODAP (Koordination der Datenerhebung an Hochschul- und Ausbildungsambulanzen für Psychotherapie in Deutschland)

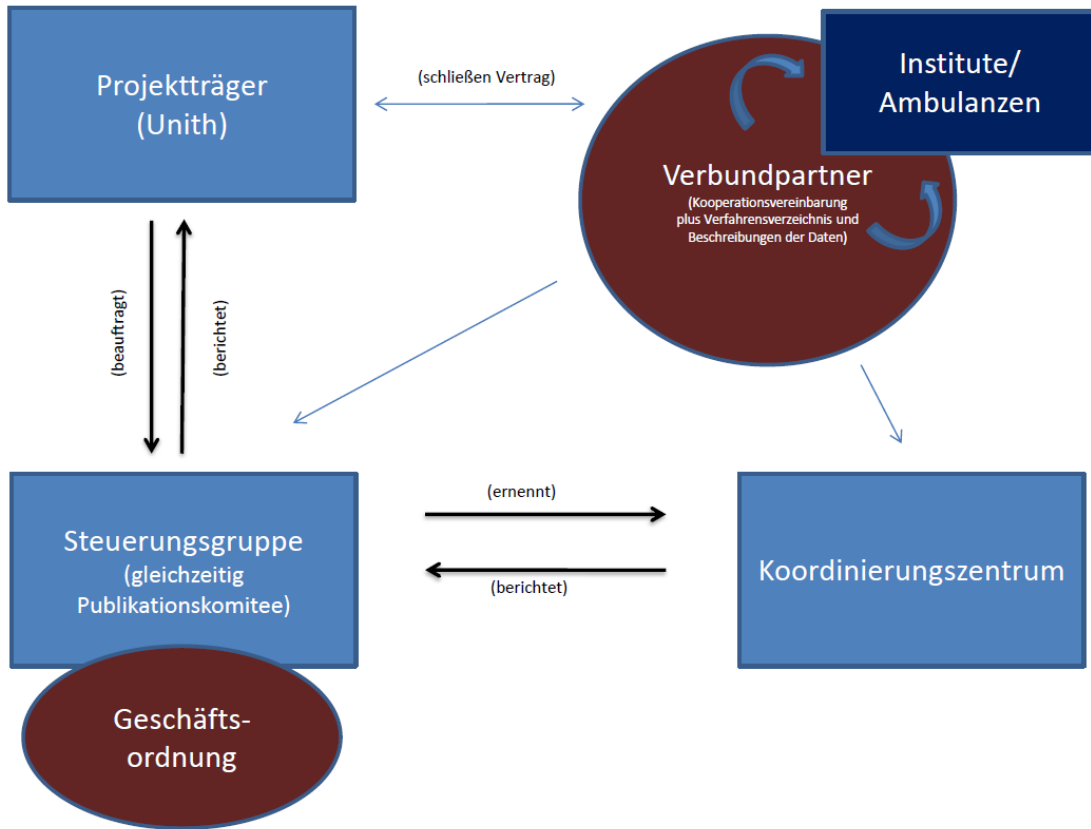

Supplement: 1616-3443_a000431_esm1.pdf [file 1616-3443_a000431_esm1.pdf]
