# Supplementary material for: Methodenpapier zur Koordination der Datenerhebung und -auswertung an Hochschul- und Ausbildungsambulanzen für Psychotherapie (KODAP)
Source: Atypon-hosted journal article supplement (doi:10.1026/1616-3443/a000431), 2017-07-01
Supplement: 1616-3443_a000431_esm2.pdf [file 1616-3443_a000431_esm2.pdf]

## **Geschäftsordnung der Steuerungsgruppe (SG) für die Koordination der Datenerhebung an Hochschulambulanzen und Ausbildungsambulanzen für Psychotherapie in Deutschland (KODAP)**

### **1. Ziele der Steuerungsgruppe**

Die SG fördert die nationale Psychotherapie- und Psychopathologieforschung, indem sie einen Forschungsverbund für die Koordination der Datenerhebung an Hochschulambulanzen und Ausbildungsambulanzen für Psychotherapie in Deutschland (KODAP) organisiert. Die SG initiiert, unterstützt und konzipiert die Forschungsaktivitäten im KODAP Projekt. Hierzu entwickelt die SG Konzepte zur Initiierung und Etablierung der Forschungsk Kooperation zwischen denjenigen universitären Ambulanzen für Psychotherapie in Deutschland, die Mitglieder des KODAP Verbundprojektes sind.

Zu den Aufgaben der SG gehören u.a.:

#### **1.1. Initiierung und Planung der KODAP Zusammenarbeit**

Aufgabe der SG ist Entwicklung und Förderung der Zusammenarbeit der KODAP Mitglieder. Dies erfolgt besonders durch die Prüfung der Voraussetzungen zur Aufnahme von universitären Ambulanzen und der Ausarbeitung und Vermittlung kooperativer Strukturen. Zentral ist dabei die Vorbereitung und Ausarbeitung der gemeinschaftlichen Forschungsfragestellungen und die Planung der quer- und längsschnittlichen Datenerhebungen in den am KODAP Projekt beteiligten Ambulanzen. Dazu Spezifisch gehört dazu u.a. die Ausarbeitung und Weiterentwicklung der Variablenlisten für die entsprechenden Datensätze und die Erstellung von Qualitätskriterien für die Speicherung, Verwertung und Veröffentlichung von Ergebnissen aus diesen Daten.

**1.2. Beauftragung des Koordinierungszentrums.** Die SG beauftragt einen Verbundpartner als Koordinierungszentrum zu fungieren, und damit die Datenerhebung zu koordinieren, die sichere Speicherung der Projektdaten zu verantworten und den Mitgliedern des Verbunds den Zugang zu dem Gesamtdatensatz zu ermöglichen. Diese Funktion wird für die Dauer von 5 Jahren übernommen.

#### **1.3. Vorbereitung der Treffen der KODAP Mitglieder**

Die SG bereitet die Treffen der KODAP Mitglieder vor, die in der Regel im Rahmen der Fachgruppentagung Klinische Psychologie der Deutschen Gesellschaft für Psychologie (DGPS) und im Rahmen des jährlichen Hochschullehrertreffens für Klinische Psychologie und Psychotherapie stattfinden.

#### **1.4. Koordination von Publikationsvorhaben**

Die Steuerungsgruppe prüft, bewertet und empfiehlt Publikationsvorhaben oder erarbeitet sie. Sie entscheidet über eine angemessene Berücksichtigung der Autoren- und Ko-Autorenschaft. Die Steuerungsgruppe prüft regelmäßig die Anzahl der im Umlauf befindlichen Manuskripte und legt die Frist für mögliche Kommentare der Co-Autoren fest. Alle Publikationsinteressen-Bekundungen sind der Steuerungsgruppe in Abstract-Form (eine Seite) vor Aufnahme der konkreten Arbeiten als Vorschlag zur Kenntnis zu bringen. Dem Abstract ist eine Vorschlagsliste der Autoren und Co-Autoren beizufügen. Die Steuerungsgruppe entscheidet über die Vorschläge und informiert alle Verbundpartner über die jeweils aktuell geplanten Publikationsprojekte. Allen Verbundpartnern muss eine angemessene Frist eingeräumt werden, um zum

Vorhaben Stellung zu beziehen (Ko-Autoren, Überschneidungen, Prioritäten, methodische Besonderheiten). In Ausnahmefällen und in Absprache mit der Steuerungsgruppe kann das Erstautorenrecht für bestimmte Fragestellungen, die sich auf den Gesamtdatensatz beziehen, auch auf ForscherInnen übertragen werden, die keinem der Zentren angehören.

## **2. Mitglieder der Steuerungsgruppe**

Die SG besteht aus einem Sprecher/einer Sprecherin, einem Sprecher/einer Sprecherin des Koordinierungszentrums sowie bis zu 8 weiteren (jedoch mindestens 3 weiteren) stimmberechtigten Mitgliedern. Diese Mitglieder gehen aus der Gruppe der Hochschullehrer und Hochschullehrerinnen für klinische Psychologie und Psychotherapie, klinische Kinder- und Jugendpsychologie sowie vergleichbarer Lehrstühle hervor. Der/die Sprecher/in wird für die Dauer von 5 Jahren gewählt. Es wird ein Mitglied der SG benannt, das für die Berichterstattung gegenüber dem Projektträger (unith) verantwortlich ist, diesem die Sitzungsprotokolle übermittelt und auf der Mitgliederversammlung von unith über den Fortgang von KODAP Bericht erstattet.

## **3. Besetzung der SG**

Die SG setzt sich Stand August 2016 aus den Mitgliedern der bisherigen KODAP-Initiativgruppe zusammen, die im Oktober 2013 im Rahmen des Hochschullehrertreffens zur Entwicklung eines Forschungskooperationsprojektes gebildet wurde. Sollte ein Mitglied ausscheiden, entscheidet die SG über die Nachbesetzung. Kandidieren können (die unter 2. definierten) Hochschullehrer aus der Gruppe der KODAP Verbundpartner. Die Dauer der Mitgliedschaft in der SG liegt bei 5 Jahren. Auf Antrag an die SG kann die Mitgliedschaft um weitere 5 Jahre verlängert werden. Ohne Verlängerungsantrag endet die Mitgliedschaft mit Ende der Amtszeit. Die Möglichkeit einer außerordentlichen Kündigung ist davon unbenommen.

## **4. Sitzungen der SG**

Die SG tritt mindestens zweimal im Jahr auf Einladung des Sprechers/der Sprecherin unter Übersendung der Tagesordnung zusammen. Falls erforderlich, kann der Sprecher/die Sprecherin auch zusätzliche Sitzungen anberaumen. Sitzungen können sowohl persönlich als auch telefonisch stattfinden.

## **5. Beschlussfähigkeit**

Die SG gilt als beschlussfähig, wenn mindestens drei der Mitglieder teilnehmen bzw. vertreten werden.

## **6. Abstimmungen**

Für Beschlüsse ist eine einfache Mehrheit nötig. Die Beschlüsse der SG können auf Antrag eines Mitgliedes auch im Umlaufverfahren erfolgen.

## **7. Protokoll der Sitzungen**

Eine vom Sprecher/der Sprecherin benannte Person führt während der Sitzungen Protokoll. Das Protokoll wird allen Mitgliedern der SG übersandt und gilt als genehmigt, wenn nicht innerhalb eines Monats Einspruch erhoben wird. Einspruch kann nur von Mitgliedern und Vertretern erhoben werden, die an der Sitzung teilgenommen haben.
