# Supplementary material for: Methodenpapier zur Koordination der Datenerhebung und -auswertung an Hochschul- und Ausbildungsambulanzen für Psychotherapie (KODAP)
Source: Atypon-hosted journal article supplement (doi:10.1026/1616-3443/a000431), 2017-07-01
Supplement: 1616-3443_a000431_esm3.pdf [file 1616-3443_a000431_esm3.pdf]

## ERSTELLUNG DES KERNDATENSATZES

Liebe Hochschulambulanzen,

anbei finden Sie einige Hinweise zur Erstellung des Datensatzes.

Bitte achten Sie auf Folgendes:

- Bitte prüfen Sie vor der Übersendung der Daten, dass die unten beschriebene Kodierung vollständig umgesetzt wurde.
- Falls einige Datenpunkte nicht vorliegen, geben Sie bitte -99 ein.
- Falls Sie die von Ihnen verwendeten Kategorien nicht sinnvoll in unsere Kategorien-Vorschläge überführen können, wählen Sie die Kategorie „Sonstiges“.
- Alle verwendeten Pseudonyme für Patienten, Therapeuten und Ambulanz dürfen keine Rückschlüsse auf Personen enthalten.
- Bitte informieren Sie sich, ob der BDI 1 oder 2 bei Ihnen eingesetzt wird und prüfen Sie, dass Sie Ihre Daten korrekt als entweder BDI1 oder BDI2 gelabelt haben (siehe unten).

Es folgen nun Erläuterungen für die einzelnen Variablen der SPSS-Datei.

Die Form ist dabei:

|                                  |           |
|----------------------------------|-----------|
| Variable<br><i>SPSS Variable</i> | Kodierung |
| Erläuterung                      |           |

## AMBULANZ

---

|                                                                                                                                                                            |                                                   |
|----------------------------------------------------------------------------------------------------------------------------------------------------------------------------|---------------------------------------------------|
| Ambulanz-ID<br><i>Ambulanz_ID</i>                                                                                                                                          | Bitte verwenden Sie die dreistellige Ambulanz-ID. |
| Das Koordinierungszentrum vergibt für jede teilnehmende Ambulanz eine dreistellige Identifikationsnummer (z. B. 223). Diese wird Ihnen zu Beginn des Projektes zugesendet. |                                                   |

## PATIENTENVARIABLEN

---

|                                                                                                                                                                                                                                                                                                                   |                                                                                                                                                                                   |
|-------------------------------------------------------------------------------------------------------------------------------------------------------------------------------------------------------------------------------------------------------------------------------------------------------------------|-----------------------------------------------------------------------------------------------------------------------------------------------------------------------------------|
| Patienten-ID<br><i>Patient_ID</i>                                                                                                                                                                                                                                                                                 | Bitte vergeben Sie eine eindeutige Identifikationskennung für jeden Patienten. Unser Vorschlag: Ambulanz-ID + Unterstrich + P + 5-stellige Ziffernkombination (z. B. 223_P32345). |
| Diese Kennung dient dazu, jeden Patienten eindeutig zu identifizieren. Sie selbst sollten diese Kennung auch Ihrer ambulanzinternen Kennung zuordnen können.<br>Wichtig: Die Kennung, die Sie uns senden, darf KEINERLEI personenbezogenen Daten, wie Geburtsdatum, Initialen oder Krankenkassennummer enthalten. |                                                                                                                                                                                   |

|                                                                                |                                           |
|--------------------------------------------------------------------------------|-------------------------------------------|
| Alter<br><i>Pat_Alter</i>                                                      | Alter in Jahren zum Zeitpunkt Prä-Testung |
| Auch hier: Bitte übersenden Sie uns aus Datenschutzgründen keine Geburtsdaten. |                                           |

|                                                                                                             |                                                      |
|-------------------------------------------------------------------------------------------------------------|------------------------------------------------------|
| Geschlecht<br><i>Pat_Geschlecht</i>                                                                         | 1 = männlich<br>2 = weiblich<br>-99 = Fehlender Wert |
| Bitte geben Sie hier das Geschlecht des Patienten an. Bei Transgendern bitte das Geburtsgeschlecht angeben. |                                                      |

|                                                                                                                                                                                                                                                                                         |                                                                                                                                 |
|-----------------------------------------------------------------------------------------------------------------------------------------------------------------------------------------------------------------------------------------------------------------------------------------|---------------------------------------------------------------------------------------------------------------------------------|
| Familienstand<br><i>Familienstand</i>                                                                                                                                                                                                                                                   | 1 = ledig<br>2 = verheiratet<br>3 = geschieden<br>4 = getrennt lebend<br>5 = verwitwet<br>6 = Sonstiges<br>-99 = Fehlender Wert |
| Bitte verwenden Sie die angegebenen Antwort-Kategorien. Falls Sie diesen Punkt anders erheben, ordnen Sie bitte Ihre Antworten unseren Kategorien zu.<br>Falls eine oder mehrere Antwortkategorien sich nicht sinnvoll zu oben genannten zuordnen lassen, wählen Sie bitte "sonstiges". |                                                                                                                                 |

|                                                     |                                            |
|-----------------------------------------------------|--------------------------------------------|
| Partnerschaft<br><i>Partnerschaft</i>               | 0 = nein<br>1 = ja<br>-99 = Fehlender Wert |
| Bitte geben Sie an, ob eine Partnerschaft vorliegt. |                                            |

|                                                                                                                                                                                                                                           |                                                                                                                                                                                                                                        |
|-------------------------------------------------------------------------------------------------------------------------------------------------------------------------------------------------------------------------------------------|----------------------------------------------------------------------------------------------------------------------------------------------------------------------------------------------------------------------------------------|
| Schulabschluss<br><i>Schule</i>                                                                                                                                                                                                           | 0 = noch Schüler<br>1 = kein Schulabschluss<br>2 = Hauptschulabschluss oder gleichwertiger Abschluss<br>3 = Realschulabschluss oder gleichwertiger Abschluss<br>4 = Abitur/Fachhochschulreife<br>5 = Sonstiges<br>-99 = Fehlender Wert |
| Bitte geben sie den höchsten erworbenen Schulabschluss an. Ordnen Sie die von Ihnen verwendeten Kategorien ggf. unseren Antwortmöglichkeiten zu. Wählen Sie Sonstiges, falls sich Ihre Kategorie nicht eindeutig/sinnvoll zuordnen lässt. |                                                                                                                                                                                                                                        |
| Berufsabschluss<br><i>Beruf</i>                                                                                                                                                                                                           | 0 = noch in Ausbildung bzw. Studium<br>1 = kein Ausbildungsabschluss<br>2 = Lehre bzw. Berufsausbildung, inkl. Fachschule, Techniker<br>3 = Universitäts- bzw. Fachhochschulabschluss<br>4 = Sonstiges<br>-99 = Fehlender Wert         |
| Bitte geben Sie den höchsten Berufsabschluss an. Wählen Sie Sonstiges, falls sich Ihre Kategorie nicht eindeutig/sinnvoll zuordnen lässt.                                                                                                 |                                                                                                                                                                                                                                        |
| AU-Status<br><i>AU_pre</i><br><i>AU_post</i>                                                                                                                                                                                              | 1 = arbeitsfähig<br>2 = arbeitsunfähig (krankgeschrieben)<br>3 = Erwerbsunfähigkeitsrente<br>4 = Altersrente<br>5 = Sonstiges<br>-99 = Fehlender Wert                                                                                  |
| Optionales Item.<br>Bitte geben Sie den optional den AU-Status bei Beginn und ggf. Ende der Therapie an.                                                                                                                                  |                                                                                                                                                                                                                                        |
| 1. Diagnosestatus<br><i>Diag1_pre</i><br><i>Diag1_post</i>                                                                                                                                                                                | 0 = es liegt keine F-Diagnose vor<br>1 = es liegt mindestens eine F-Diagnose vor<br>-99 = Fehlender Wert                                                                                                                               |
| Basis der berichteten Diagnosen soll eine standardisierte Befunderhebung bzw. ein strukturiertes Interview nach ICD-10 oder DSM-IV / DSM-5 sein.                                                                                          |                                                                                                                                                                                                                                        |
| 1. Diagnose (ICD)<br><i>ICD1_pre</i><br><i>ICD1_post</i>                                                                                                                                                                                  | ICD-10 Code der 1. Diagnose (Indexdiagnose / Hauptvorstellungsgrund) zum Prä- und Postzeitpunkt<br>-99 = Fehlender Wert                                                                                                                |
| Geben Sie hier die erste im System aufgeführte Diagnose an.<br>Form: F60.31 (kein Leerzeichen, 1 bis 2 Stellen nach dem Punkt)                                                                                                            |                                                                                                                                                                                                                                        |
| 2. Diagnose<br><i>Diag2_pre</i><br><i>Diag2_post</i>                                                                                                                                                                                      | 0 = aktuell keine 2. F-Diagnose<br>1 = 2. F-Diagnose liegt vor<br>-99 = Fehlender Wert                                                                                                                                                 |
| Basis der berichteten Diagnosen soll eine standardisierte Befunderhebung bzw. ein strukturiertes Interview nach ICD-10 oder DSM-IV / DSM-5 sein.                                                                                          |                                                                                                                                                                                                                                        |
| 2. Diagnose (ICD)<br><i>ICD2_pre</i><br><i>ICD2_post</i>                                                                                                                                                                                  | ICD-10 Code der 2. Diagnose zum Prä- und Postzeitpunkt<br>-99 = Fehlender Wert                                                                                                                                                         |
| Geben Sie hier die zweite im System aufgeführte Diagnose an.                                                                                                                                                                              |                                                                                                                                                                                                                                        |

|                                                                                                                                                  |                                                                                                                                                                          |
|--------------------------------------------------------------------------------------------------------------------------------------------------|--------------------------------------------------------------------------------------------------------------------------------------------------------------------------|
| 3. Diagnose<br><i>Diag3_pre</i><br><i>Diag3_post</i>                                                                                             | 0 = aktuell keine 3. F-Diagnose<br>1 = 3. F-Diagnose liegt vor<br>-99 = Fehlender Wert                                                                                   |
| Basis der berichteten Diagnosen soll eine standardisierte Befunderhebung bzw. ein strukturiertes Interview nach ICD-10 oder DSM-IV / DSM-5 sein. |                                                                                                                                                                          |
| 3. Diagnose (ICD)<br><i>ICD3_pre</i><br><i>ICD3_post</i>                                                                                         | ICD-10 Code der 3. Diagnose zum Prä- und Postzeitpunkt<br>-99 = Fehlender Wert                                                                                           |
| Geben Sie hier die dritte im System aufgeführte Diagnose an.                                                                                     |                                                                                                                                                                          |
| 4. Diagnose<br><i>Diag4_pre</i><br><i>Diag4_post</i>                                                                                             | 0 = aktuell keine 4. F-Diagnose<br>1 = 4. F-Diagnose liegt vor<br>-99 = Fehlender Wert                                                                                   |
| Basis der berichteten Diagnosen soll eine standardisierte Befunderhebung bzw. ein strukturiertes Interview nach ICD-10 oder DSM-IV / DSM-5 sein. |                                                                                                                                                                          |
| 4. Diagnose (ICD)<br><i>ICD4_pre</i><br><i>ICD4_post</i>                                                                                         | ICD-10 Code der 4. Diagnose zum Prä- und Postzeitpunkt<br>-99 = Fehlender Wert                                                                                           |
| Geben Sie hier die vierte im System aufgeführte Diagnose an.                                                                                     |                                                                                                                                                                          |
| 5. Diagnose<br><i>Diag5_pre</i><br><i>Diag5_post</i>                                                                                             | 0 = aktuell keine 5. F-Diagnose<br>1 = 5. F-Diagnose liegt vor<br>-99 = Fehlender Wert                                                                                   |
| Basis der berichteten Diagnosen soll eine standardisierte Befunderhebung bzw. ein strukturiertes Interview nach ICD-10 oder DSM-IV / DSM-5 sein. |                                                                                                                                                                          |
| 5. Diagnose (ICD)<br><i>ICD5_pre</i><br><i>ICD5_post</i>                                                                                         | ICD-10 Code der 5. Diagnose zum Prä- und Postzeitpunkt<br>-99 = Fehlender Wert                                                                                           |
| Geben Sie hier die fünfte im System aufgeführte Diagnose an.                                                                                     |                                                                                                                                                                          |
| Gesamtanzahl Diagnosen<br><i>DiagTotal_pre</i><br><i>DiagTotal_post</i>                                                                          | Gesamtanzahl aller vergebenen F-Diagnosen zum Prä- und Postzeitpunkt                                                                                                     |
|                                                                                                                                                  |                                                                                                                                                                          |
| Vorbehandlung<br><i>Vorbehandlung</i>                                                                                                            | 0 = keine Vorbehandlung<br>1 = ambulante Psychotherapie<br>2 = stationäre Psychotherapie<br>3 = beides<br>4 = ja (genaue Angabe nicht vorhanden)<br>-99 = Fehlender Wert |
| Bitte geben Sie hier an, ob der Patient vor der jetzigen Therapie bereits Psychotherapie in Anspruch genommen hat.                               |                                                                                                                                                                          |

## THERAPEUTEN-VARIABLEN

|                                                                                                                                                                                                                                                                                                         |                                                                                                                                                                                                 |
|---------------------------------------------------------------------------------------------------------------------------------------------------------------------------------------------------------------------------------------------------------------------------------------------------------|-------------------------------------------------------------------------------------------------------------------------------------------------------------------------------------------------|
| Therapeuten-ID<br><i>Ther_ID</i>                                                                                                                                                                                                                                                                        | Bis zu 10 Stellen; Zahlen oder Buchstaben bzw. einer Kombination bestehen. Unser Vorschlag: Ambulanz-ID + Unterstrich +T (für Therapeut/in) + 5-stellige Ziffernkombination (z. B. 223_T76553). |
| Bitte vergeben Sie hier eine eindeutige Identifikationskennung für jeden Therapeuten. Sie selbst sollten diese Kennung auch Ihrer ambulanzinternen Kennung zuordnen können. Wichtig: Die Kennung, die Sie uns senden, darf KEINERLEI personenbezogene Daten, wie Geburtsdatum oder Initialen enthalten. |                                                                                                                                                                                                 |
| Therapeutenwechsel<br><i>Therap_Wechsel</i>                                                                                                                                                                                                                                                             | 0 = nein<br>1 = ja<br>-99 = Fehlender Wert                                                                                                                                                      |
| Bitte geben Sie an, ob es bei dieser Therapie ein Therapeutenwechsel stattgefunden hat. Diese Variable ist erst zum Postzeitpunkt auszufüllen.                                                                                                                                                          |                                                                                                                                                                                                 |
| Alter des Therapeuten<br><i>Ther_Alter</i>                                                                                                                                                                                                                                                              | Alter in Jahren                                                                                                                                                                                 |
| Gegen Sie das Therapeuten-Alter zur Prä-Testung an. Auch hier: Bitte übersenden Sie uns aus Datenschutzgründen keine Geburtsdaten.                                                                                                                                                                      |                                                                                                                                                                                                 |
| Geschlecht des Therapeuten<br><i>Ther_Geschlecht</i>                                                                                                                                                                                                                                                    | 1 = männlich<br>2 = weiblich<br>-99 = Fehlender Wert                                                                                                                                            |
| Bitte geben Sie hier das Geschlecht des Therapeuten bzw. der Therapeutin an. Achten Sie auch hier auf den richtigen Code.                                                                                                                                                                               |                                                                                                                                                                                                 |
| Approbation<br><i>Approbation</i>                                                                                                                                                                                                                                                                       | 0 = nein<br>1 = ja<br>-99 = Fehlender Wert                                                                                                                                                      |
| Bitte geben Sie hier an, ob zum Prä-Zeitpunkt der Therapie eine Approbation vorlag oder nicht.                                                                                                                                                                                                          |                                                                                                                                                                                                 |

## THERAPIE-VARIABLEN

|                                                                                                                                                                                                                                                                                                                                   |                                                                                                                                                                                            |
|-----------------------------------------------------------------------------------------------------------------------------------------------------------------------------------------------------------------------------------------------------------------------------------------------------------------------------------|--------------------------------------------------------------------------------------------------------------------------------------------------------------------------------------------|
| Art der Therapie<br><i>Therapie_Setting</i>                                                                                                                                                                                                                                                                                       | 1 = Einzeltherapie<br>2 = Gruppentherapie<br>3 = Kombination aus Einzel- und Gruppentherapie<br>4 = Sonstiges<br>-99 = Fehlender Wert                                                      |
| Bitte geben Sie an, ob es sich um eine Einzel- oder Gruppentherapie handelt.                                                                                                                                                                                                                                                      |                                                                                                                                                                                            |
| Anzahl der besuchten Sprechstunden<br><i>Anzahl_Sprech</i>                                                                                                                                                                                                                                                                        | Anzahl der besuchten Sprechstunden                                                                                                                                                         |
| Sitzungen: 25 Minuten. Falls wesentlich längere oder kürzere Sitzungen stattgefunden haben, rechnen Sie diese bitte auf 25minütige Sitzungen um.<br>Ab dem 1. April 2017 können Psychotherapeuten ihren Patienten eine Sprechstunde anbieten. Es finden dennoch auch in Zukunft probatorische Gespräche statt.                    |                                                                                                                                                                                            |
| Anzahl der probatorischen Sitzungen<br><i>Anzahl_Prob</i>                                                                                                                                                                                                                                                                         | Anzahl probatorische Sitzungen                                                                                                                                                             |
| Sitzungen: 50 Minuten. Falls wesentlich längere oder kürzere Sitzungen stattgefunden haben, rechnen Sie diese bitte auf 50minütige Sitzungen um.                                                                                                                                                                                  |                                                                                                                                                                                            |
| Anzahl der Sitzungen nach der Probatorik<br><i>Anzahl_Sitzu</i>                                                                                                                                                                                                                                                                   | Anzahl der Sitzungen nach Probatorik                                                                                                                                                       |
| Sitzungen: 50 Minuten. Falls wesentlich längere oder kürzere Sitzungen stattgefunden haben, rechnen Sie diese bitte auf 50minütige Sitzungen um.                                                                                                                                                                                  |                                                                                                                                                                                            |
| Daten der Prä- und Postmessungen<br><i>Test_pre</i><br><i>Test_post</i>                                                                                                                                                                                                                                                           | Datum in der Form MMM JJJJ (z. B. für Januar 2017: 001 2017)                                                                                                                               |
| Bitte geben Sie hier die den Monat und das Jahr der Prä- und Postmessung an. Bitte senden Sie uns aus Datenschutzgründen kein tagesgenaues Datum und verwenden Sie die oben beschriebene Formatierung.<br>Falls dafür verschiedene Daten bestehen, wählen Sie bitte den Monat, in dem der BSI und /oder der BDI ausgefüllt wurde. |                                                                                                                                                                                            |
| Beginn und Ende der Therapie<br><i>Therapie_pre</i><br><i>Therapie_post</i>                                                                                                                                                                                                                                                       | Datum in der Form MMM JJJJ (z. B. für Januar 2017: 001 2017)                                                                                                                               |
| Bitte geben Sie hier den Monat und das Jahr der ersten und letzten Therapiesitzung an. Bitte senden Sie uns aus Datenschutzgründen kein tagesgenaues Datum und verwenden Sie die oben beschriebene Formatierung.                                                                                                                  |                                                                                                                                                                                            |
| Therapieverfahren<br><i>Ther_Verfahren</i>                                                                                                                                                                                                                                                                                        | 1 = Verhaltenstherapie<br>2 = Tiefenpsychologische Therapie<br>3 = Psychoanalyse<br>4 = Gesprächspsychotherapie<br>5 = Systemische Psychotherapie<br>6 = Sonstiges<br>-99 = Fehlender Wert |
| Bitte geben Sie die Art des durchgeführten Therapieverfahrens an.                                                                                                                                                                                                                                                                 |                                                                                                                                                                                            |

|                                                                                                                                                                                                                                                                                                                          |                                                                                                                        |
|--------------------------------------------------------------------------------------------------------------------------------------------------------------------------------------------------------------------------------------------------------------------------------------------------------------------------|------------------------------------------------------------------------------------------------------------------------|
| Abschluss<br><i>Abschluss</i>                                                                                                                                                                                                                                                                                            | 0 = Therapie läuft noch<br>1 = Reguläres Therapieende<br>2 = Abbruch<br>3 = keine Kostenübernahme<br>4 = Unterbrechung |
| Optionales Item.<br>Bitte geben Sie optional an, ob die Therapie regulär beendet wurde. Mit einer Unterbrechung ist gemeint, dass die Therapie z. B. aufgrund eines stationären Aufenthaltes des Patienten unterbrochen ist, jedoch danach wieder aufgenommen wird. Falls die Therapie noch läuft, geben Sie bitte 0 an. |                                                                                                                        |
| Forschungs- oder Ausbildungsambulanz<br><i>Ambulanz_Art</i>                                                                                                                                                                                                                                                              | 1 = Forschungsambulanz<br>2 = Ausbildungsambulanz<br>-99 = Fehlender Wert                                              |
| Optionales Item.<br>Bitte geben Sie optional an, ob es sich bei Ihrer Einrichtung um eine Forschungs- oder Ausbildungsambulanz handelt.                                                                                                                                                                                  |                                                                                                                        |

## PSYCHOMETRISCHE VARIABLEN

|                                                                                                                                                                                                                                                         |                                                                                                                                                                                                                                                                       |
|---------------------------------------------------------------------------------------------------------------------------------------------------------------------------------------------------------------------------------------------------------|-----------------------------------------------------------------------------------------------------------------------------------------------------------------------------------------------------------------------------------------------------------------------|
| CGI Schweregrad (Therapeut)<br><i>CGI_Schwere_pre</i>                                                                                                                                                                                                   | 1 = überhaupt nicht psychisch krank<br>2 = ein Grenzfall psychischer Erkrankung<br>3 = leicht psychisch krank<br>4 = mäßig psychisch krank<br>5 = deutlich psychisch krank<br>6 = schwer psychisch krank<br>7 = extrem schwer psychisch krank<br>-99 = Fehlender Wert |
| Optionales Item.<br>Bitte geben Sie die Therapeuteneinschätzung des Beeinträchtigungsgrades des Patienten zu Therapiebeginn an. Bitte achten Sie auf die richtige Kodierung: 1 steht für keine Beeinträchtigung, 7 für extrem schwere Beeinträchtigung. |                                                                                                                                                                                                                                                                       |
| CGI Veränderungsmessung (Ther)<br><i>CGI_Verä_Th_post</i>                                                                                                                                                                                               | 1 = sehr deutlich gebessert<br>2 = deutlich gebessert<br>3 = etwas gebessert<br>4 = keine Veränderung<br>5 = etwas verschlechtert<br>6 = deutlich verschlechtert<br>7 = sehr deutlich verschlechtert<br>-99 = Fehlender Wert                                          |
| Bitte geben Sie uns die therapeutische Einschätzung des Therapieerfolges zum Post-Zeitpunkt von 1 bis 7 an. Bitte achten Sie auf die richtige Kodierung: 1 steht für eine sehr deutliche Besserung, 7 für eine sehr deutliche Verschlechterung.         |                                                                                                                                                                                                                                                                       |
| CGI Veränderungsmessung (Pat)<br><i>CGI_Verä_Pat_post</i>                                                                                                                                                                                               | 1 = sehr deutlich gebessert<br>2 = deutlich gebessert<br>3 = etwas gebessert<br>4 = keine Veränderung<br>5 = etwas verschlechtert<br>6 = deutlich verschlechtert<br>7 = sehr deutlich verschlechtert<br>-99 = Fehlender Wert                                          |
| Bitte geben Sie uns die Einschätzung des Therapieerfolges aus Patientensicht zum Post-Zeitpunkt von 1 bis 7 an. Bitte achten Sie auf die richtige Kodierung: 1 steht für eine sehr deutliche Besserung, 7 für eine sehr deutliche Verschlechterung.     |                                                                                                                                                                                                                                                                       |
| BSI oder SCL?<br><i>BSI_SCL</i>                                                                                                                                                                                                                         | 1 = BSI<br>2 = SCL<br>-99 = Fehlender Wert                                                                                                                                                                                                                            |
| Bitte geben Sie zunächst an, ob Sie den BSI oder SCL verwenden.                                                                                                                                                                                         |                                                                                                                                                                                                                                                                       |
| Becks Depressionsinventar I oder II<br><i>BDI_Version</i>                                                                                                                                                                                               | 1 = BDI I<br>2 = BDI II<br>-99 = Fehlender Wert                                                                                                                                                                                                                       |
| Bitte geben Sie zunächst an, welche Version des BDI Sie verwenden.                                                                                                                                                                                      |                                                                                                                                                                                                                                                                       |



|                                                                                                                      |                                                                                                             |
|----------------------------------------------------------------------------------------------------------------------|-------------------------------------------------------------------------------------------------------------|
| Brief Symptom Inventory (BSI)<br><i>BSIX_pre</i><br><i>BSIX_post</i>                                                 | 0 = überhaupt nicht<br>1 = ein wenig<br>2 = ziemlich<br>3 = stark<br>4 = sehr stark<br>-99 = Fehlender Wert |
| Bitte übermitteln Sie die jeweiligen Werte auf Item-Ebene. Interessant sind sowohl die Prä- als auch die Post-Werte. |                                                                                                             |

|                                                                                                                      |                                                                                                             |
|----------------------------------------------------------------------------------------------------------------------|-------------------------------------------------------------------------------------------------------------|
| Symptom-Checkliste 90 (SCL)<br><i>SCLX_pre</i><br><i>SCLX_post</i>                                                   | 0 = überhaupt nicht<br>1 = ein wenig<br>2 = ziemlich<br>3 = stark<br>4 = sehr stark<br>-99 = Fehlender Wert |
| Bitte übermitteln Sie die jeweiligen Werte auf Item-Ebene. Interessant sind sowohl die Prä- als auch die Post-Werte. |                                                                                                             |

|                                                                                                |                                                  |
|------------------------------------------------------------------------------------------------|--------------------------------------------------|
| Becks Depressionsinventar I<br><i>BDI1_X_pre</i><br><i>BDI1_X_post</i>                         | 0 =<br>1 =<br>2 =<br>3 =<br>-99 = Fehlender Wert |
| Bitte nur ausfüllen, wenn Sie den BDI 1 verwenden. Bitte die Daten auf Item-Ebene übermitteln. |                                                  |

|                                                                                                |                                                  |
|------------------------------------------------------------------------------------------------|--------------------------------------------------|
| Becks Depressionsinventar II<br><i>BDI2_X_pre</i><br><i>BDI2_X_post</i>                        | 0 =<br>1 =<br>2 =<br>3 =<br>-99 = Fehlender Wert |
| Bitte nur ausfüllen, wenn Sie den BDI 2 verwenden. Bitte die Daten auf Item-Ebene übermitteln. |                                                  |
