# Supplementary material for: Methodenpapier zur Koordination der Datenerhebung und -auswertung an Hochschul- und Ausbildungsambulanzen für Psychotherapie (KODAP)
Source: Atypon-hosted journal article supplement (doi:10.1026/1616-3443/a000431), 2017-07-01
Supplement: 1616-3443_a000431_esm4.pdf [file 1616-3443_a000431_esm4.pdf]

# ERSTELLUNG DES KERNDATENSATZES KINDER- UND JUGENDPSYCHOTHERAPIEAMBULANZEN

Liebe Hochschulambulanzen,

anbei finden Sie einige Hinweise zur Erstellung des Datensatzes.

Bitte achten Sie auf Folgendes:

- Bitte prüfen Sie vor der Übersendung der Daten, dass die unten beschriebene Kodierung vollständig umgesetzt wurde.
- Falls einige Datenpunkte nicht vorliegen, geben Sie bitte -99 ein.
- Falls Sie die von Ihnen verwendeten Kategorien nicht sinnvoll in unsere Kategorien-Vorschläge überführen können, wählen Sie die Kategorie „Sonstiges“.
- Alle verwendeten Pseudonyme für Patienten, Therapeuten und Ambulanz dürfen keine Rückschlüsse auf Personen enthalten.

Es folgen nun Erläuterungen für die einzelnen Variablen der SPSS-Datei.

Die Form ist dabei:

| Variable<br><i>SPSS Variable</i> | Kodierung |
|----------------------------------|-----------|
| Erläuterung                      |           |

## AMBULANZ

---

|                                                                                                                                                                            |                                                   |
|----------------------------------------------------------------------------------------------------------------------------------------------------------------------------|---------------------------------------------------|
| Ambulanz-ID<br><i>Ambulanz_ID</i>                                                                                                                                          | Bitte verwenden Sie die dreistellige Ambulanz-ID. |
| Das Koordinierungszentrum vergibt für jede teilnehmende Ambulanz eine dreistellige Identifikationsnummer (z. B. 223). Diese wird Ihnen zu Beginn des Projektes zugesendet. |                                                   |

## PATIENTENVARIABLEN

---

|                                                                                                                                                                                                                                                                                                                   |                                                                                                                                                                                  |
|-------------------------------------------------------------------------------------------------------------------------------------------------------------------------------------------------------------------------------------------------------------------------------------------------------------------|----------------------------------------------------------------------------------------------------------------------------------------------------------------------------------|
| Patienten-ID<br><i>Patienten_ID</i>                                                                                                                                                                                                                                                                               | Bitte vergeben Sie eine eindeutige Identifikationskennung für jeden Patienten. Unser Vorschlag: Ambulanz-ID + Unterstrich + P + 5-stellige Ziffernkombination (z.B. 223_P32345). |
| Diese Kennung dient dazu, jeden Patienten eindeutig zu identifizieren. Sie selbst sollten diese Kennung auch Ihrer ambulanzinternen Kennung zuordnen können.<br>Wichtig: Die Kennung, die Sie uns senden, darf KEINERLEI personenbezogenen Daten, wie Geburtsdatum, Initialen oder Krankenkassennummer enthalten. |                                                                                                                                                                                  |

|                                                                                |                                                                                                                                                                             |
|--------------------------------------------------------------------------------|-----------------------------------------------------------------------------------------------------------------------------------------------------------------------------|
| Alter<br><i>Pat_Alter_Jahre_pre</i><br><i>Pat_Alter_Monate_pre</i>             | Alter in Jahren bzw. Monaten zum Zeitpunkt Prätestung.<br>Monate ergänzend zum Alter in Jahren (z.B. wenn 6 Jahre und 8 Monate alt, in diesen Variablen die Werte 6 bzw. 8) |
| Auch hier: Bitte übersenden Sie uns aus Datenschutzgründen keine Geburtsdaten. |                                                                                                                                                                             |

|                                                                                |                                                                                                                                                                                     |
|--------------------------------------------------------------------------------|-------------------------------------------------------------------------------------------------------------------------------------------------------------------------------------|
| Alter<br><i>Pat_Alter_Jahre_diag</i><br><i>Pat_Alter_Monate_diag</i>           | Alter in Jahren bzw. Monaten zum Zeitpunkt der Diagnosegebung.<br>Monate ergänzend zum Alter in Jahren (z.B. wenn 6 Jahre und 8 Monate alt, in diesen Variablen die Werte 6 bzw. 8) |
| Auch hier: Bitte übersenden Sie uns aus Datenschutzgründen keine Geburtsdaten. |                                                                                                                                                                                     |

|                                                                                |                                                                                                                                                                                                |
|--------------------------------------------------------------------------------|------------------------------------------------------------------------------------------------------------------------------------------------------------------------------------------------|
| Alter<br><i>Pat_Alter_Jahre_struint</i><br><i>Pat_Alter_Monate_struint</i>     | Alter in Jahren bzw. Monaten zum Zeitpunkt des strukturierten Interviews.<br>Monate ergänzend zum Alter in Jahren (z.B. wenn 6 Jahre und 8 Monate alt, in diesen Variablen die Werte 6 bzw. 8) |
| Auch hier: Bitte übersenden Sie uns aus Datenschutzgründen keine Geburtsdaten. |                                                                                                                                                                                                |

|                                                                                                             |                                                      |
|-------------------------------------------------------------------------------------------------------------|------------------------------------------------------|
| Geschlecht<br><i>Geschlecht</i>                                                                             | 1 = männlich<br>2 = weiblich<br>-99 = Fehlender Wert |
| Bitte geben Sie hier das Geschlecht des Patienten an. Bei Transgendern bitte das Geburtsgeschlecht angeben. |                                                      |

|                                                                                                                                                  |                                                                                                                         |
|--------------------------------------------------------------------------------------------------------------------------------------------------|-------------------------------------------------------------------------------------------------------------------------|
| 1. Diagnosestatus<br><i>Diag1_pre</i><br><i>Diag1_post</i>                                                                                       | 0 = es liegt keine F-Diagnose vor<br>1 = es liegt mindestens eine F-Diagnose vor<br>-99 = Fehlender Wert                |
| Basis der berichteten Diagnosen soll eine standardisierte Befunderhebung bzw. ein strukturiertes Interview nach ICD-10 oder DSM-IV / DSM-5 sein. |                                                                                                                         |
| 1. Diagnose (ICD)<br><i>ICD1_pre</i><br><i>ICD1_post</i>                                                                                         | ICD-10 Code der 1. Diagnose (Indexdiagnose / Hauptvorstellungsgrund) zum Prä- und Postzeitpunkt<br>-99 = Fehlender Wert |
| Geben Sie hier die erste im System aufgeführte Diagnose an.<br>Form: F60.31 (kein Leerzeichen, 1 bis 2 Stellen nach dem Punkt)                   |                                                                                                                         |
| 2. Diagnose<br><i>Diag2_pre</i><br><i>Diag2_post</i>                                                                                             | 0 = aktuell keine 2. F-Diagnose<br>1 = 2. F-Diagnose liegt vor<br>-99 = Fehlender Wert                                  |
| Basis der berichteten Diagnosen soll eine standardisierte Befunderhebung bzw. ein strukturiertes Interview nach ICD-10 oder DSM-IV / DSM-5 sein. |                                                                                                                         |
| 2. Diagnose (ICD)<br><i>ICD2_pre</i><br><i>ICD2_post</i>                                                                                         | ICD-10 Code der 2. Diagnose zum Prä- und Postzeitpunkt<br>-99 = Fehlender Wert                                          |
| Geben Sie hier die zweite im System aufgeführte Diagnose an.                                                                                     |                                                                                                                         |
| 3. Diagnose<br><i>Diag3_pre</i><br><i>Diag3_post</i>                                                                                             | 0 = aktuell keine 3. F-Diagnose<br>1 = 3. F-Diagnose liegt vor<br>-99 = Fehlender Wert                                  |
| Basis der berichteten Diagnosen soll eine standardisierte Befunderhebung bzw. ein strukturiertes Interview nach ICD-10 oder DSM-IV / DSM-5 sein. |                                                                                                                         |
| 3. Diagnose (ICD)<br><i>ICD3_pre</i><br><i>ICD3_post</i>                                                                                         | ICD-10 Code der 3. Diagnose zum Prä- und Postzeitpunkt<br>-99 = Fehlender Wert                                          |
| Geben Sie hier die dritte im System aufgeführte Diagnose an.                                                                                     |                                                                                                                         |
| 4. Diagnose<br><i>Diag4_pre</i><br><i>Diag4_post</i>                                                                                             | 0 = aktuell keine 4. F-Diagnose<br>1 = 4. F-Diagnose liegt vor<br>-99 = Fehlender Wert                                  |
| Basis der berichteten Diagnosen soll eine standardisierte Befunderhebung bzw. ein strukturiertes Interview nach ICD-10 oder DSM-IV / DSM-5 sein. |                                                                                                                         |
| 4. Diagnose (ICD)<br><i>ICD4_pre</i><br><i>ICD4_post</i>                                                                                         | ICD-10 Code der 4. Diagnose zum Prä- und Postzeitpunkt<br>-99 = Fehlender Wert                                          |
| Geben Sie hier die vierte im System aufgeführte Diagnose an.                                                                                     |                                                                                                                         |
| 5. Diagnose<br><i>Diag5_pre</i><br><i>Diag5_post</i>                                                                                             | 0 = aktuell keine 5. F-Diagnose<br>1 = 5. F-Diagnose liegt vor<br>-99 = Fehlender Wert                                  |
| Basis der berichteten Diagnosen soll eine standardisierte Befunderhebung bzw. ein strukturiertes Interview nach ICD-10 oder DSM-IV / DSM-5 sein. |                                                                                                                         |

|                                                              |                                                                                |
|--------------------------------------------------------------|--------------------------------------------------------------------------------|
| 5. Diagnose (ICD)<br><i>ICD5_pre</i><br><i>ICD5_post</i>     | ICD-10 Code der 5. Diagnose zum Prä- und Postzeitpunkt<br>-99 = Fehlender Wert |
| Geben Sie hier die fünfte im System aufgeführte Diagnose an. |                                                                                |

|                                                                                             |                                                                                              |
|---------------------------------------------------------------------------------------------|----------------------------------------------------------------------------------------------|
| Gesamtzahl<br>Diagnosen<br><i>DiagTotal_pre</i><br><i>DiagTotal_post</i>                    | Gesamtanzahl aller vergebenen F-Diagnosen zum Prä- und Postzeitpunkt<br>-99 = Fehlender Wert |
| Bitte tragen Sie hier die Gesamtzahl der ICD-10 Diagnosen bei der Prä- und Posttestung ein. |                                                                                              |

|                                                                                                                                                                                                                                                                     |                                                                                                                    |
|---------------------------------------------------------------------------------------------------------------------------------------------------------------------------------------------------------------------------------------------------------------------|--------------------------------------------------------------------------------------------------------------------|
| Weitere Diagnose<br>Post<br><i>Weitere_Diag1</i><br><i>ICD_Weitere1</i><br><i>Weitere_Diag2</i><br><i>ICD_Weitere2</i><br><i>Weitere_Diag3</i><br><i>ICD_Weitere3</i><br><i>Weitere_Diag4</i><br><i>ICD_Weitere4</i><br><i>Weitere_Diag5</i><br><i>ICD_Weitere5</i> | 0 = F-Diagnose liegt nicht vor<br>1 = F-Diagnose liegt vor<br><br>ICD10-Code der Diagnose (Beispiel ICD10: F60.31) |
| Geben Sie hier an, ob bei dem Patienten eine 1./2./3./4./5. weitere Diagnose bei der Posttestung vorliegt. Bitte geben Sie auch hier den ICD-10 Code der Diagnose an.                                                                                               |                                                                                                                    |

|                                                                     |                                                                                                                                                                                                                       |
|---------------------------------------------------------------------|-----------------------------------------------------------------------------------------------------------------------------------------------------------------------------------------------------------------------|
| Schule<br><i>Schule</i>                                             | 1 = Krippe / Kindergarten<br>2 = Grundschule<br>3 = Realschule Plus<br>4 = Gymnasium<br>5 = Sonder-Förderschule<br>6 = Waldorfschule / Montessori Schule<br>7 = Gesamtschule<br>8 = Sonstiges<br>-99 = Fehlender Wert |
| Geben Sie hier an, welche Schule der Patient besucht / besucht hat. |                                                                                                                                                                                                                       |

|                                                                                                                                                                                                                                           |                                                                                                                                                                                                                                                                                                                                          |
|-------------------------------------------------------------------------------------------------------------------------------------------------------------------------------------------------------------------------------------------|------------------------------------------------------------------------------------------------------------------------------------------------------------------------------------------------------------------------------------------------------------------------------------------------------------------------------------------|
| Schul- bzw. Berufsabschluss<br><i>Schul_Berufsabschluss</i>                                                                                                                                                                               | 1 = kein Ausbildungsabschluss<br>2 = Hauptschulabschluss<br>3 = Mittlere Reife<br>4 = Fachhochschulreife<br>5 = Abitur<br>6 = Universitäts- bzw. Fachhochschulabschluss<br>7 = Lehre bzw. Berufsausbildung, inkl. Fachschule, Techniker<br>8 = Arbeitssuchend<br>9 = Sonstiges<br>10 = Zu jung für den Abschluss<br>-99 = Fehlender Wert |
| Bitte geben sie den höchsten erworbenen Schulabschluss an. Ordnen Sie die von Ihnen verwendeten Kategorien ggf. unseren Antwortmöglichkeiten zu. Wählen Sie Sonstiges, falls sich Ihre Kategorie nicht eindeutig/sinnvoll zuordnen lässt. |                                                                                                                                                                                                                                                                                                                                          |

|                                                                                                                                         |                                                                                                                                                                                                                     |
|-----------------------------------------------------------------------------------------------------------------------------------------|---------------------------------------------------------------------------------------------------------------------------------------------------------------------------------------------------------------------|
| Wohnsituation<br><i>Wohnsituation</i>                                                                                                   | 1 = Bei den Eltern<br>2 = Mutter<br>3 = Vater<br>4 = Pflegeeltern<br>5 = Adoptiveltern<br>6 = Stationäre Jugendhilfe<br>7 = Teilstationäre Jugendhilfe (Tagesgruppen o.Ä.)<br>8 = Sonstiges<br>-99 = Fehlender Wert |
| Bitte geben Sie die aktuelle Wohnsituation an. Wählen Sie Sonstiges, falls sich Ihre Kategorie nicht eindeutig/sinnvoll zuordnen lässt. |                                                                                                                                                                                                                     |

|                                                                                                                                                                         |                                                                                                                                                                                                                                                                                                                                                                                                                                                                                                                                                                        |
|-------------------------------------------------------------------------------------------------------------------------------------------------------------------------|------------------------------------------------------------------------------------------------------------------------------------------------------------------------------------------------------------------------------------------------------------------------------------------------------------------------------------------------------------------------------------------------------------------------------------------------------------------------------------------------------------------------------------------------------------------------|
| Psychosoziale Belastungsfaktoren<br><i>Psychosoziale_Belastungsfaktoren_1</i><br><i>Psychosoziale_Belastungsfaktoren_2</i><br><i>Psychosoziale_Belastungsfaktoren_3</i> | 0 = keine<br>1 = abnorme intrafamiliäre Beziehungen<br>2 = psychische Störung, abweichendes Verhalten oder Behinderung in der Familie<br>3 = inadäquate oder verzerrte intrafamiliäre Kommunikation<br>4 = abnorme Erziehungsbedingungen<br>5 = abnorme unmittelbare Umgebung<br>6 = akute, belastende Lebensereignisse<br>7 = gesellschaftliche Belastungsfaktoren<br>8 = chronische zwischenmenschliche Belastung im Zusammenhang mit der Schule oder Arbeit<br>9 = belastende Lebensereignisse/Situationen infolge von Verhaltensstörungen/Behinderungen des Kindes |
| Geben Sie an, ob aktuell schwierige psychosoziale Belastungsfaktoren vorliegen? Achse 5 MAS (bitte bis zu drei Hauptbelastungsfaktoren eintragen)                       |                                                                                                                                                                                                                                                                                                                                                                                                                                                                                                                                                                        |

|                                                                                                                                                                                                                                                                                                                              |                                                                                                                                                        |
|------------------------------------------------------------------------------------------------------------------------------------------------------------------------------------------------------------------------------------------------------------------------------------------------------------------------------|--------------------------------------------------------------------------------------------------------------------------------------------------------|
| Frühere Behandlungen<br><i>Fruehere_Behandlungen</i><br><i>Fruehere_Behandlungen_psych</i><br><i>Fruehere_Behandlungen_stat</i><br><i>Fruehere_Behandlungen_früh</i><br><i>Fruehere_Behandlungen_ergo</i><br><i>Fruehere_Behandlungen_log</i><br><i>Fruehere_Behandlungen_psycha</i><br><i>Fruehere_Behandlungen_sonstig</i> | 0 = nein<br>1 = ja<br>Psychotherapie<br>stationäre Therapie<br>Frühförderung<br>Ergotherapie<br>Logotherapie<br>psychiatrische Behandlung<br>Sonstiges |
| Geben Sie an, ob es frühere Behandlungen gab.                                                                                                                                                                                                                                                                                |                                                                                                                                                        |

## PSYCHOMETRISCHE VARIABLEN

|                                                         |                                                                                                                            |
|---------------------------------------------------------|----------------------------------------------------------------------------------------------------------------------------|
| Bezugsperson<br><i>Bezugsperson</i>                     | 1 = Eltern<br>2 = Mutter<br>3 = Vater<br>4 = Großeltern<br>5 = Außerfamiliäre Person (Jugendhilfe)<br>-99 = Fehlender Wert |
| Ergänzen Sie hier bitte die Bezugsperson des Patienten. |                                                                                                                            |

|                                                                                                                                                                       |                                                                                      |
|-----------------------------------------------------------------------------------------------------------------------------------------------------------------------|--------------------------------------------------------------------------------------|
| Child Behavior Checklist (CBCL)<br><i>M_pre_CBCLX</i><br><i>V_pre_CBCLX</i><br><i>M_Post_CBCLX</i><br><i>V_Post_CBCLX</i><br><i>M_Kat_CBCLX</i><br><i>V_Kat_CBCLX</i> | 0 = nicht zutreffend<br>1 = etwas/manchmal zutreffend<br>2 = genau/häufig zutreffend |
| M = Mutter ; V = Vater ; Pre = Prämessung ; Post = Postmessung ; Kat = Katamnese                                                                                      |                                                                                      |

|                                                                                                 |                                                                                      |
|-------------------------------------------------------------------------------------------------|--------------------------------------------------------------------------------------|
| Youth Self Report (YSR)<br><i>YSR</i><br><i>pre_YSRX</i><br><i>post_YSRX</i><br><i>kat_YSRX</i> | 0 = nicht zutreffend<br>1 = etwas/manchmal zutreffend<br>2 = genau/häufig zutreffend |
| Pre = Prämessung ; Post = Postmessung ; Kat = Katamnese                                         |                                                                                      |

|                                                             |                                                                                                                                                                                                                                                                       |
|-------------------------------------------------------------|-----------------------------------------------------------------------------------------------------------------------------------------------------------------------------------------------------------------------------------------------------------------------|
| CGI Schweregrad (pre)<br><i>CGI_Schwere_pre</i>             | 1 = überhaupt nicht psychisch krank<br>2 = ein Grenzfall psychischer Erkrankung<br>3 = leicht psychisch krank<br>4 = mäßig psychisch krank<br>5 = deutlich psychisch krank<br>6 = schwer psychisch krank<br>7 = extrem schwer psychisch krank<br>-99 = Fehlender Wert |
| Beantworten Sie bitte folgende Frage: „Der Patient ist ...“ |                                                                                                                                                                                                                                                                       |

|                                                                                            |                                                                                                                                                                                                                              |
|--------------------------------------------------------------------------------------------|------------------------------------------------------------------------------------------------------------------------------------------------------------------------------------------------------------------------------|
| CGI Veränderungsmessung (post)<br><i>CGI_Verae_post</i>                                    | 1 = sehr deutlich gebessert<br>2 = deutlich gebessert<br>3 = etwas gebessert<br>4 = keine Veränderung<br>5 = etwas verschlechtert<br>6 = deutlich verschlechtert<br>7 = sehr deutlich verschlechtert<br>-99 = Fehlender Wert |
| Bitte geben Sie die Veränderungen des Patienten, im Vergleich zum Beginn der Therapie, an. |                                                                                                                                                                                                                              |

|                                                                                                         |                                                                                                                                                                                                                              |
|---------------------------------------------------------------------------------------------------------|------------------------------------------------------------------------------------------------------------------------------------------------------------------------------------------------------------------------------|
| CGI Veränderungsmessung (post)<br><i>CGI_Verae_post_P</i>                                               | 1 = sehr deutlich gebessert<br>2 = deutlich gebessert<br>3 = etwas gebessert<br>4 = keine Veränderung<br>5 = etwas verschlechtert<br>6 = deutlich verschlechtert<br>7 = sehr deutlich verschlechtert<br>-99 = Fehlender Wert |
| Bitte geben Sie an, wie der Patient seine Veränderungen, im Vergleich zum Beginn der Therapie, ansieht. |                                                                                                                                                                                                                              |

|                                                                                                                    |                                                                                                                                                                                                                              |
|--------------------------------------------------------------------------------------------------------------------|------------------------------------------------------------------------------------------------------------------------------------------------------------------------------------------------------------------------------|
| CGI Veränderungsmessung (post)<br><i>CGI_Verae_post_V</i>                                                          | 1 = sehr deutlich gebessert<br>2 = deutlich gebessert<br>3 = etwas gebessert<br>4 = keine Veränderung<br>5 = etwas verschlechtert<br>6 = deutlich verschlechtert<br>7 = sehr deutlich verschlechtert<br>-99 = Fehlender Wert |
| Bitte geben Sie an, wie der Vater des Patienten dessen Veränderungen, im Vergleich zum Beginn der Therapie, sieht. |                                                                                                                                                                                                                              |

|                                                                                                                     |                                                                                                                                                                                                                              |
|---------------------------------------------------------------------------------------------------------------------|------------------------------------------------------------------------------------------------------------------------------------------------------------------------------------------------------------------------------|
| CGI Veränderungsmessung (post)<br><i>CGI_Verae_post_M</i>                                                           | 1 = sehr deutlich gebessert<br>2 = deutlich gebessert<br>3 = etwas gebessert<br>4 = keine Veränderung<br>5 = etwas verschlechtert<br>6 = deutlich verschlechtert<br>7 = sehr deutlich verschlechtert<br>-99 = Fehlender Wert |
| Bitte geben Sie an, wie die Mutter des Patienten dessen Veränderungen, im Vergleich zum Beginn der Therapie, sieht. |                                                                                                                                                                                                                              |

## THERAPEUTEN-VARIABLEN

|                                                                                                                                                                                                                                                                                                         |                                                                                                                                                                                                  |
|---------------------------------------------------------------------------------------------------------------------------------------------------------------------------------------------------------------------------------------------------------------------------------------------------------|--------------------------------------------------------------------------------------------------------------------------------------------------------------------------------------------------|
| Therapeuten-ID<br><i>Ther_ID</i>                                                                                                                                                                                                                                                                        | Bis zu 10 Stellen; Zahlen oder Buchstaben bzw. einer Kombination bestehen. Unser Vorschlag: Ambulanz-ID + Unterstrich + T (für Therapeut/in) + 5-stellige Ziffernkombination (z. B. 223_T27364). |
| Bitte vergeben Sie hier eine eindeutige Identifikationskennung für jeden Therapeuten. Sie selbst sollten diese Kennung auch Ihrer ambulanzinternen Kennung zuordnen können. Wichtig: Die Kennung, die Sie uns senden, darf KEINERLEI personenbezogene Daten, wie Geburtsdatum oder Initialen enthalten. |                                                                                                                                                                                                  |
| Therapeutenwechsel<br><i>Therap_Wechsel</i>                                                                                                                                                                                                                                                             | 0 = nein<br>1 = ja<br>-99 = Fehlender Wert                                                                                                                                                       |
| Bitte geben Sie an, ob es bei dieser Therapie ein Therapeutenwechsel stattgefunden hat. Diese Variable ist erst zum Postzeitpunkt auszufüllen.                                                                                                                                                          |                                                                                                                                                                                                  |
| Alter des Therapeuten<br><i>Ther_Alter</i>                                                                                                                                                                                                                                                              | Alter in Jahren                                                                                                                                                                                  |
| Geben Sie das Therapeuten-Alter zur Prä-Testung an. Auch hier: Bitte übersenden Sie uns aus Datenschutzgründen keine Geburtsdaten.                                                                                                                                                                      |                                                                                                                                                                                                  |
| Geschlecht des Therapeuten<br><i>Ther_Geschlecht</i>                                                                                                                                                                                                                                                    | 1 = männlich<br>2 = weiblich<br>-99 = Fehlender Wert                                                                                                                                             |
| Bitte geben Sie hier das Geschlecht des Therapeuten bzw. der Therapeutin an. Achten Sie auch hier auf den richtigen Code.                                                                                                                                                                               |                                                                                                                                                                                                  |
| Approbation<br><i>Approbation</i>                                                                                                                                                                                                                                                                       | 0 = nein<br>1 = ja<br>-99 = Fehlender Wert                                                                                                                                                       |
| Bitte geben Sie hier an, ob zum Prä-Zeitpunkt der Therapie eine Approbation vorlag oder nicht.                                                                                                                                                                                                          |                                                                                                                                                                                                  |

## THERAPIE-VARIABLEN

|                                                                                                                                                                                                                                                                                                                                    |                                                                                                                                                                                            |
|------------------------------------------------------------------------------------------------------------------------------------------------------------------------------------------------------------------------------------------------------------------------------------------------------------------------------------|--------------------------------------------------------------------------------------------------------------------------------------------------------------------------------------------|
| Art der Therapie<br><i>Therapie_Setting</i>                                                                                                                                                                                                                                                                                        | 1 = Einzeltherapie<br>2 = Gruppentherapie<br>3 = Kombination Einzel- u. Gruppentherapie<br>4 = Sonstiges<br>-99 = Fehlender Wert                                                           |
| Bitte geben Sie an, ob es sich um eine Einzel- oder Gruppentherapie handelt.                                                                                                                                                                                                                                                       |                                                                                                                                                                                            |
| Anzahl der besuchten Sprechstunden<br><i>Anzahl_Sprech</i>                                                                                                                                                                                                                                                                         | Anzahl der besuchten Sprechstunden                                                                                                                                                         |
| Sitzungen: 25 Minuten. Falls wesentlich längere oder kürzere Sitzungen stattgefunden haben, rechnen Sie diese bitte auf 25minütige Sitzungen um.<br>Ab dem 1. April 2017 können Psychotherapeuten ihren Patienten eine Sprechstunde anbieten. Es finden dennoch auch in Zukunft probatorische Gespräche statt.                     |                                                                                                                                                                                            |
| Anzahl der probatorischen Sitzungen<br><i>Anzahl_Prob</i>                                                                                                                                                                                                                                                                          | Anzahl probatorischer Sitzungen                                                                                                                                                            |
| Sitzungen: 50 Minuten. Falls wesentlich längere oder kürzere Sitzungen stattgefunden haben, rechnen Sie diese bitte auf 50minütige Sitzungen um. Ab dem 1. April 2017 können Psychotherapeuten ihren Patienten eine Sprechstunde anbieten. Es finden dennoch auch in Zukunft probatorische Gespräche statt.                        |                                                                                                                                                                                            |
| Anzahl der Sitzungen nach der Probatorik<br><i>Anzahl_Sitzu</i>                                                                                                                                                                                                                                                                    | Anzahl der Sitzungen nach Probatorik                                                                                                                                                       |
| Sitzungen: 50 Minuten. Falls wesentlich längere oder kürzere Sitzungen stattgefunden haben, rechnen Sie diese bitte auf 50minütige Sitzungen um.                                                                                                                                                                                   |                                                                                                                                                                                            |
| Daten der Prä- und Postmessungen<br><i>Test_pre</i><br><i>Test_post</i>                                                                                                                                                                                                                                                            | Datum in der Form MMM JJJJ (z. B. für Januar 2017: 001 2017)                                                                                                                               |
| Bitte geben Sie hier die den Monat und das Jahr der Prä- und Postmessung an. Bitte senden Sie uns aus Datenschutzgründen kein tagesgenaues Datum und verwenden Sie die oben beschriebene Formatierung.<br>Falls dafür verschiedene Daten bestehen, wählen Sie bitte den Monat, in dem der CDCL und /oder der YSR ausgefüllt wurde. |                                                                                                                                                                                            |
| Beginn und Ende der Therapie<br><i>Therapie_pre</i><br><i>Therapie_post</i>                                                                                                                                                                                                                                                        | Datum in der Form MMM JJJJ (z. B. für Januar 2017: 001 2017)                                                                                                                               |
| Bitte geben Sie hier den Monat und das Jahr der ersten und letzten Therapiesitzung an. Bitte senden Sie uns aus Datenschutzgründen kein tagesgenaues Datum und verwenden Sie die oben beschriebene Formatierung.                                                                                                                   |                                                                                                                                                                                            |
| Therapieverfahren<br><i>Ther_Verfahren</i>                                                                                                                                                                                                                                                                                         | 1 = Verhaltenstherapie<br>2 = Tiefenpsychologische Therapie<br>3 = Psychoanalyse<br>4 = Gesprächspsychotherapie<br>5 = Systemische Psychotherapie<br>6 = Sonstiges<br>-99 = Fehlender Wert |
| Bitte geben Sie die Art des durchgeführten Therapieverfahrens an.                                                                                                                                                                                                                                                                  |                                                                                                                                                                                            |

|                                                                                                                                                                                                                                                                                                                          |                                                                                                                                                                                       |
|--------------------------------------------------------------------------------------------------------------------------------------------------------------------------------------------------------------------------------------------------------------------------------------------------------------------------|---------------------------------------------------------------------------------------------------------------------------------------------------------------------------------------|
| Abschluss<br><i>Abschluss</i>                                                                                                                                                                                                                                                                                            | 0 = Therapie läuft noch<br>1 = Reguläres Therapieende<br>2 = Abbruch von Seiten des Patienten<br>3 = Abbruch von Seiten des Therapeuten<br>4 = keine Kostenübernahme<br>5 = Sonstiges |
| Optionales Item.<br>Bitte geben Sie optional an, ob die Therapie regulär beendet wurde. Mit einer Unterbrechung ist gemeint, dass die Therapie z. B. aufgrund eines stationären Aufenthaltes des Patienten unterbrochen ist, jedoch danach wieder aufgenommen wird. Falls die Therapie noch läuft, geben Sie bitte 0 an. |                                                                                                                                                                                       |
| Forschungs- oder Ausbildungsambulanz<br><i>Ambulanz_Art</i>                                                                                                                                                                                                                                                              | 1 = Forschungsambulanz<br>2 = Ausbildungsambulanz<br>-99 = Fehlender Wert                                                                                                             |
| Optionales Item.<br>Bitte geben Sie optional an, ob es sich bei Ihrer Einrichtung um eine Forschungs- oder Ausbildungsambulanz handelt.                                                                                                                                                                                  |                                                                                                                                                                                       |

## ELTERN-VARIABLEN

|                                                                                                                                                                         |                                                                                                                                                                                                                                 |
|-------------------------------------------------------------------------------------------------------------------------------------------------------------------------|---------------------------------------------------------------------------------------------------------------------------------------------------------------------------------------------------------------------------------|
| Alter<br><i>Alter_Mutter</i><br><i>Alter_Vater</i>                                                                                                                      | Alter in Jahren                                                                                                                                                                                                                 |
| Auch hier: Bitte übersenden Sie uns aus Datenschutzgründen keine Geburtsdaten.                                                                                          |                                                                                                                                                                                                                                 |
| Daten Eltern<br><i>Daten_Eltern</i>                                                                                                                                     | 1 = Beiden Elternteilen<br>2 = Nur von der Mutter<br>3 = Nur vom Vater<br>4 = Keinem Elternteil                                                                                                                                 |
| Geben Sie hier bitte an, von welchen Elternteilen die Daten erhalten/ausgefüllt wurden.                                                                                 |                                                                                                                                                                                                                                 |
| Beziehungsstatus<br><i>Beziehungsstatus_Eltern</i>                                                                                                                      | 1 = ledig<br>2 = verheiratet<br>3 = geschieden<br>4 = getrennt lebend<br>5 = verwitwet<br>6 = gemeinsam lebend, nicht verheiratet<br>-99 = Fehlender Wert                                                                       |
| Was ist der aktuelle Beziehungsstand der Eltern?                                                                                                                        |                                                                                                                                                                                                                                 |
| Beziehungsstatus<br><i>Beziehungsstatus_Mutter</i><br><i>Beziehungsstatus_Vater</i>                                                                                     | 0 = In keiner neuen Partnerschaft<br>1 = In einer neuen Partnerschaft<br>2 = Wiederverheiratet mit neuem Partner<br>-99 = Fehlender Wert                                                                                        |
| Diese Frage muss nur beantwortet werden, wenn die Eltern geschieden, getrennt lebend oder verwitwet sind. Was ist der aktuelle Beziehungsstand der Mutter / des Vaters? |                                                                                                                                                                                                                                 |
| Schulabschluss<br><i>Schulabschluss_Mutter</i><br><i>Schulabschluss_Vater</i>                                                                                           | 1 = (noch) kein Schulabschluss<br>2 = Hauptschulabschluss oder gleichwertiger Abschluss<br>3 = Realschulabschluss oder gleichwertiger Abschluss<br>4 = Abitur/Fachhochschulreife<br>5 = Sonstiges<br>-99 = Fehlender Wert       |
| Geben Sie bitte den höchsten allgemeinbildenden Schulabschluss beider Elternteile an.                                                                                   |                                                                                                                                                                                                                                 |
| Berufsabschluss<br><i>Berufsabschluss_Mutter</i><br><i>Berufsabschluss_Vater</i>                                                                                        | 1 = kein Ausbildungsabschluss<br>2 = noch in Ausbildung bzw. Studium<br>3 = Lehre bzw. Berufsausbildung, inkl. Fachschule, Techniker<br>4 = Universitäts- bzw. Fachhochschulabschluss<br>5 = Sonstiges,<br>-99 = Fehlender Wert |
| Welchen höchsten berufsqualifizierenden Abschluss haben beide Elternteile bislang erworben?                                                                             |                                                                                                                                                                                                                                 |

|                                                                                                                                                                                                            |                                                                                                                                                                                                                                                                   |
|------------------------------------------------------------------------------------------------------------------------------------------------------------------------------------------------------------|-------------------------------------------------------------------------------------------------------------------------------------------------------------------------------------------------------------------------------------------------------------------|
| AU-Status<br><i>AU-Status_Mutter</i><br><i>AU-Status_Vater</i>                                                                                                                                             | 1 = arbeitsfähig<br>2 = arbeitsunfähig (krankgeschrieben)<br>3 = Erwerbsunfähigkeitsrente aufgrund psychischer Probleme<br>4 = Erwerbsunfähigkeitsrente aufgrund anderer Gründe<br>5 = Altersrente<br>6 = arbeitssuchend<br>7 = Sonstiges<br>-99 = Fehlender Wert |
| Optionale Items.<br>Bitte geben Sie hier optional an, ob eines der Elternteile derzeit arbeitsfähig bzw. krankgeschrieben ist.                                                                             |                                                                                                                                                                                                                                                                   |
| Brief Symptom Inventory (BSI)<br><i>M_pre_BSIX</i><br><i>V_pre_BSIX</i><br><i>M_post_BSIX</i><br><i>V_post_BSIX</i><br><i>M_kat_BSIX</i><br><i>V_kat_BSIX</i>                                              | 0 = überhaupt nicht<br>1 = ein wenig<br>2 = ziemlich<br>3 = stark<br>4 = sehr stark<br>-99 = Fehlender Wert                                                                                                                                                       |
| Bitte geben Sie hier die jeweiligen BSI Gesamtwerte für Mutter und Vater ein. Wenn vorhanden auch die Katamnese Daten.<br>M = Mutter ; V = Vater ; Pre = Prämessung ; Post = Postmessung ; Kat = Katamnese |                                                                                                                                                                                                                                                                   |
