# Supplementary material for: Methodenpapier zur Koordination der Datenerhebung und -auswertung an Hochschul- und Ausbildungsambulanzen für Psychotherapie (KODAP)
Source: Atypon-hosted journal article supplement (doi:10.1026/1616-3443/a000431), 2017-07-01
Supplement: 1616-3443_a000431_esm5.pdf [file 1616-3443_a000431_esm5.pdf]

Ambulanzleitung: [Name]  
Geschäftsführung: [Name]

Adresse

Email-Adresse

 [Telefonnummer]

[Erreichbarkeit]

 [Faxnummer]

 [Email-Adresse]

## Erklärung

---

Vorname und Name des Patienten / der Patientin

Geburtsdatum

### Allgemeine Aufklärung

Hiermit erkläre ich, dass ich über den Ablauf und die besonderen Bedingungen einer psychotherapeutischen Behandlung im [Name der Ambulanz] der [Name der Universität] informiert worden bin, insbesondere in Bezug auf die Dokumentation meiner persönlichen Daten und meines Therapieverlaufs in der Patientenakte, in der Rechneranlage sowie auf Ton- und Bilddatenträgern.

[Ort], den

---

Datum

Unterschrift

### Therapiedokumentation

Zur Planung und Beantragung, Durchführung, Abrechnung und zur Dokumentation meiner psychotherapeutischen Behandlung werden Informationen über mich und meine Problemstellung erhoben und ausgewertet. Für den Schutz meiner Daten sind angemessene Maßnahmen vorgesehen. Ich erkläre mich mit der Erhebung, Verarbeitung und Nutzung für diese Zwecke einverstanden.

[Ort], den

---

Datum

Unterschrift

### Schweigepflichtsentbindung (intern)

Sämtliche Behandlungen am Zentrum für Psychotherapie werden supervidiert (Einzel- und Gruppensupervision). Soweit für diesen Zweck erforderlich entbinde ich meine Behandler/in und die Ambulanz von der Schweigepflicht gegenüber dem/der zuständigen Supervisor/in (und dessen/deren Stellvertreter/in) bzw. den ambulanzinternen Teilnehmern der Gruppensupervision.

[Ort], den

---

Datum

Unterschrift

### Forschungsbezogene Datenverwendung

Der Verlauf und der Erfolg jeder Psychotherapie am Zentrum für Psychotherapie wird durch regelmäßige Fragebogenerhebungen erfasst. Alle therapiebezogenen Daten werden nach Ablauf ihrer Behandlung – anonymisiert, ohne ihren Namen oder sonstige Personendaten – in den Datenbestand der Arbeitseinheit für Klinische Psychologie und Psychotherapie übernommen und ggf. im Rahmen wissenschaftlicher Untersuchungen ausgewertet. Falls Daten, z. B. im Rahmen von wissenschaftlichen Kooperationsprojekten, im In- oder Ausland weitergegeben werden, erfolgt dies ausschließlich zu statistischen/wissenschaftlichen Zwecken und Sie werden darin ausnahmslos *nicht* namentlich genannt. Ich erkläre mich mit der Erhebung, Verarbeitung und Nutzung meiner – vollständig anonymisierten - Daten für forschungsbezogenen Zwecke einverstanden.

Mein Einverständnis gilt vorbehaltlich eines jederzeit möglichen Widerrufs

[Ort], den

---

Datum

Unterschrift

### **Videoaufzeichnungen: Einverständnis zu Zwecken der Vor- und Nachbereitung und Supervision der Therapiesitzungen**

Ich erkläre mich damit einverstanden, dass im Rahmen meiner Behandlung Gesprächsaufzeichnungen in Wort und Bild erstellt werden, und dass diese zur Optimierung der Behandlung und Supervision genutzt werden. Es wird dafür Sorge getragen, dass die Schutzbelange meiner Person voll gewürdigt bleiben: Einblick erhalten nur Personen, die mit meiner Behandlung beruflich befasst sind und der Schweigepflicht unterliegen. Die Aufnahmen werden spätestens zum Ende der Therapie gelöscht und nicht langfristig gespeichert. Mein Einverständnis gilt vorbehaltlich eines jederzeit möglichen Widerrufs

[Ort], den

---

Datum

Unterschrift

### **Videoaufzeichnungen: Einverständnis zu forschungsbezogenen Auswertung einzelner Videoaufzeichnungen**

Ich erkläre mich damit einverstanden, dass Gesprächsaufzeichnungen meiner Behandlung in Wort und Bild im Rahmen forschungsbezogener Auswertungen verarbeitet und genutzt werden. Es wird dafür Sorge getragen, dass die Schutzbelange meiner Person voll gewürdigt bleiben: Einblick erhalten nur Personen, die mit der jeweiligen Forschungsfrage beruflich befasst sind und der Schweigepflicht unterliegen. Die Aufnahmen werden entsprechend der Archivierungsaufgaben von Forschungsarbeiten aufbewahrt. Mein Einverständnis gilt vorbehaltlich eines jederzeit möglichen Widerrufs

[Ort], den

---

Datum

Unterschrift

### **Videoaufzeichnungen: Einverständnis zur Nutzung einzelner Videoaufzeichnungen in der Ausbildung zukünftiger Psychotherapeutinnen**

Ich erkläre mich damit einverstanden, dass Gesprächsaufzeichnungen meiner Behandlung in Wort und Bild für die Ausbildung zukünftiger Psychotherapeuten und Psychotherapeutinnen, verwendet werden dürfen. Es wird dafür Sorge getragen, dass die Schutzbelange meiner Person voll gewürdigt bleiben: Einblick erhalten nur Personen, die der Schweigepflicht unterliegen. Die Aufnahmen werden auf unbestimmte Zeit archiviert. Mein Einverständnis gilt vorbehaltlich eines jederzeit möglichen Widerrufs

[Ort], den

---

Datum

Unterschrift

### **Emailkontakte**

Ich bin darüber aufgeklärt worden, dass Emails **nicht** den Ansprüchen des Datenschutzes und damit der therapeutischen Schweigepflicht genügen. Ich erkläre mich dennoch damit einverstanden, dass Terminabsprachen per Email getroffen werden können.

[Ort], den

---

Datum

Unterschrift

Die Einwilligungen in dieser Erklärung sind vollkommen freiwillig. Sie können jederzeit mit Wirkung für die Zukunft widerrufen werden, soweit nicht gesetzliche Pflichten oder die ordnungsgemäße Abwicklung der Therapievereinbarung dem entgegenstehen.
